# Supplementary material for: Pseudomonas aeruginosa Bacterioferritin Is Assembled from FtnA and BfrB Subunits with the Relative Proportions Dependent on the Environmental Oxygen Availability
Source: MDPI journal article supplement (doi:10.3390/biom12030366), 2022-02-25
Supplement: s1 [file s1]

# Supplementary Information

## ***Pseudomonas aeruginosa* Bacterioferritin is Assembled from FtnA and BfrB Subunits with the Relative Proportions Dependent on the Environmental Oxygen Availability**

Huili Yao<sup>1</sup>, Anabel Soldano<sup>1</sup>, Leo Fontenot<sup>1</sup>, Fabrizio Donnarumma<sup>1</sup>, Scott Lovell<sup>2</sup>, Josephine R Chandler<sup>3</sup>, and Mario Rivera<sup>1,\*</sup>

<sup>1</sup> Department of Chemistry, Louisiana State University, 232 Choppin Hall, Baton Rouge, LA, 70803, USA; [hyao@lsu.edu](mailto:hyao@lsu.edu) (H. Y.); [asoldano@lsu.edu](mailto:asoldano@lsu.edu) (A. S.); [lfont39@lsu.edu](mailto:lfont39@lsu.edu) (L. F.); [fabrizio@lsu.edu](mailto:fabrizio@lsu.edu) (F. D.)

<sup>2</sup> Protein Structure and X-ray Crystallography Laboratory, University of Kansas, 2030 Becker Dr., Lawrence, KS 66047, USA; [swlovell@ku.edu](mailto:swlovell@ku.edu)

<sup>3</sup> Department of Molecular Biosciences, University of Kansas, 1220 Sunnyside Ave., Lawrence, KS, 66045, USA; [jrchandler@ku.edu](mailto:jrchandler@ku.edu)

\*Correspondence: [mrivera@lsu.edu](mailto:mrivera@lsu.edu)

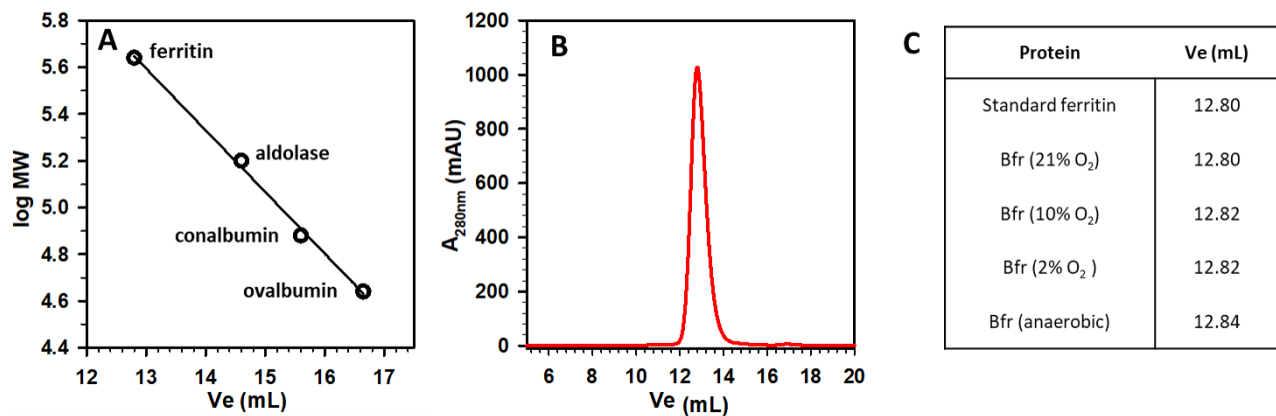

**Figure S1.** Bfr purified from *P. aeruginosa* PAO1 is assembled from 24 subunits. **(A)** Calibration curve obtained using the elution volume ( $V_e$ ) of 24-mer ferritin (440 kDa), aldolase (158 kDa), conalbumin (75 kDa), and ovalbumin (44 kDa), loaded onto a Superdex200 Increase (10 × 300GL) column equilibrated and eluted with 100 mM potassium phosphate, 1 mM TCEP (pH 7.6). **(B)** Representative chromatogram obtained when Bfr isolated from PAO1 cells cultured in 21% O<sub>2</sub> was loaded onto the same Superdex200 Increase column equilibrated and eluted with 100 mM potassium phosphate, 1 mM TCEP (pH 7.6). **(C)** Comparing the  $V_e$  values of Bfr isolated from PAO1 cells cultured aerobically (21% O<sub>2</sub>), micro aerobically (10% or 2% O<sub>2</sub>), and anaerobically, indicates that the isolated Bfr molecules are 24-mers.

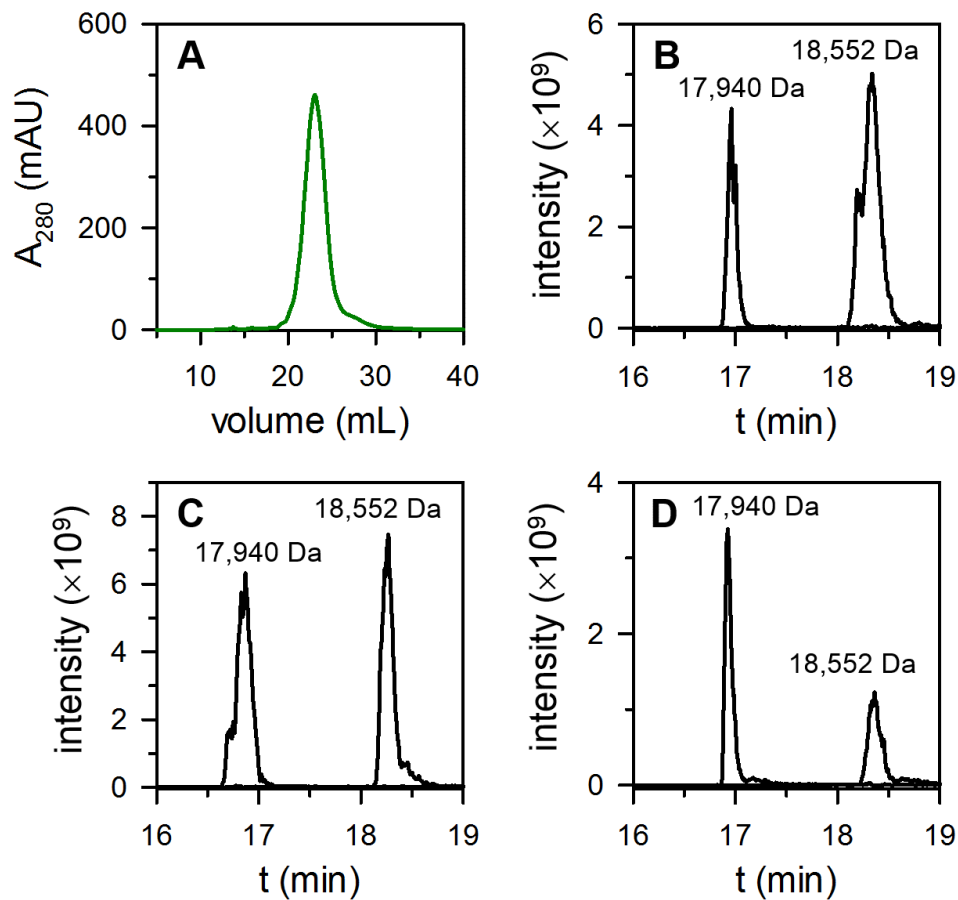

**Figure S2.** Bfr isolated from *P. aeruginosa* PAO1 cells cultured in 2%  $O_2$  is a mix of 24-mer heterooligomeric Bfr constituted of FtnA and BfrB subunits. (A) Pure Bfr injected on a Source<sup>TM</sup> 15Q column elutes in a single peak. The extracted ion chromatograms (EICs) obtained from LC-MS analysis of protein eluting from the Source<sup>TM</sup> 15Q column in the (B) left, (C) center, and (D) right sections of the peak show the presence of FtnA (17,940 Da) and BfrB (18,552 Da) subunits. The content of FtnA and BfrB subunits in Bfr was estimated from the corresponding integrated peak areas in the EIC and the values are presented in Table 1.

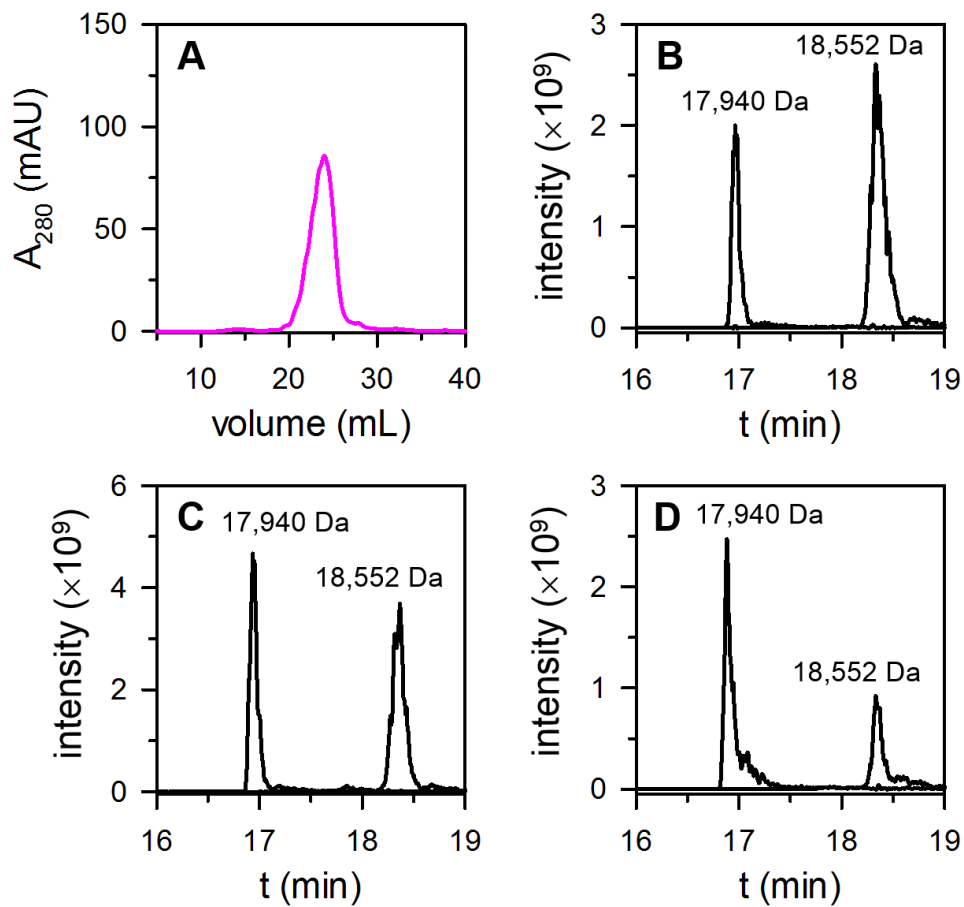

**Figure S3.** Bfr isolated from *P. aeruginosa* PAO1 cells cultured under anaerobic conditions is a mix of 24-mer heterooligomeric Bfr constituted of FtnA and BfrB subunits. (A) Pure Bfr injected on a Source<sup>TM</sup> 15Q column elutes in one peak. The extracted ion chromatograms (EICs) obtained from LC-MS analysis of protein eluting from the Source<sup>TM</sup> 15Q column in the (B) left, (C) center, and (D) right sections of the peak show the presence of FtnA (17,940 Da) and BfrB (18,552 Da) subunits. The content of FtnA and BfrB subunits in Bfr was estimated from the corresponding integrated peak areas in the EIC and the values are presented in Table 1.

**Table S1.** Proteins present in the excised gel band from a native gel lane loaded with  $\Delta$ *ftnA* lysate solution obtained from cells cultured aerobically. The proteins presented in the table all Sum PEP Score greater than 40 and are sorted from higher score to lower score.

| Accession  | Description                                                                             | Sum PEP Score | Coverage [%] | # Peptides | # PSMs | # Unique Peptides | # AAs | MW [kDa] |
|------------|-----------------------------------------------------------------------------------------|---------------|--------------|------------|--------|-------------------|-------|----------|
| PA4812 ref | gi 308198350  formate dehydrogenase-O, major subunit                                    | 265.93        | 60           | 44         | 78     | 44                | 1025  | 113.9    |
| PA4735 ref | gi 15599929  hypothetical protein                                                       | 197.53        | 42           | 36         | 97     | 36                | 1088  | 118.5    |
| PA4385 ref | gi 15599581  GroEL protein                                                              | 170.35        | 60           | 26         | 199    | 26                | 547   | 57.1     |
| PA5307 ref | gi 15600500  hypothetical protein                                                       | 168.48        | 55           | 30         | 82     | 30                | 855   | 92.9     |
| PA5146 ref | gi 15600339  hypothetical protein                                                       | 158.19        | 49           | 32         | 83     | 32                | 750   | 80.8     |
| PA4423 ref | gi 15599619  conserved hypothetical protein                                             | 145.70        | 53           | 20         | 70     | 20                | 604   | 65.6     |
| PA5368 ref | gi 15600561  membrane protein component of ABC phosphate transporter                    | 143.46        | 51           | 24         | 81     | 24                | 677   | 73.8     |
| PA3922 ref | gi 15599117  conserved hypothetical protein                                             | 141.67        | 57           | 21         | 78     | 21                | 455   | 51.2     |
| PA2815 ref | gi 15598011  probable acyl-CoA dehydrogenase                                            | 136.14        | 47           | 25         | 71     | 25                | 815   | 88.7     |
| PA3724 ref | gi 15598919  elastase LasB                                                              | 135.19        | 52           | 20         | 76     | 20                | 498   | 53.7     |
| PA1342 ref | gi 15596539  AatJ                                                                       | 130.21        | 73           | 20         | 123    | 20                | 302   | 33.0     |
| PA3848 ref | gi 15599043  hypothetical protein                                                       | 127.48        | 48           | 20         | 76     | 20                | 451   | 50.5     |
| PA2249 ref | gi 15597445  branched-chain alpha-keto acid dehydrogenase (lipoamide component)         | 126.90        | 53           | 18         | 75     | 18                | 428   | 45.7     |
| PA4489 ref | gi 15599685  MagD                                                                       | 126.13        | 31           | 30         | 71     | 30                | 1516  | 167.3    |
| PA1587 ref | gi 15596784  dihydrolipoamide dehydrogenase Lpd                                         | 121.48        | 45           | 19         | 68     | 19                | 478   | 50.1     |
| PA3531 ref | gi 15598727  bacterioferritin                                                           | 109.92        | 83           | 11         | 73     | 11                | 158   | 18.5     |
| PA1586 ref | gi 15596783  dihydrolipoamide succinyltransferase (E2 subunit)                          | 98.24         | 53           | 17         | 53     | 17                | 409   | 42.9     |
| PA2999 ref | gi 15598195  Na <sup>+</sup> -translocating NADH:ubiquinone oxidoreductase subunit Nrq1 | 97.34         | 59           | 20         | 46     | 20                | 445   | 48.1     |
| PA3836 ref | gi 15599031  hypothetical protein                                                       | 95.23         | 58           | 14         | 41     | 14                | 325   | 34.2     |
| PA0459 ref | gi 15595656  probable ClpA/B protease ATP binding subunit                               | 90.44         | 32           | 21         | 50     | 19                | 850   | 94.1     |
| PA4786 ref | gi 15599980  probable short-chain dehydrogenase                                         | 88.76         | 64           | 18         | 52     | 18                | 451   | 47.2     |
| PA5554 ref | gi 15600747  ATP synthase beta chain                                                    | 86.72         | 50           | 15         | 42     | 15                | 458   | 49.5     |
| PA5435 ref | gi 15600628  probable transcarboxylase subunit                                          | 85.86         | 41           | 15         | 45     | 15                | 607   | 66.1     |
| PA4277 ref | gi 15599473  elongation factor Tu                                                       | 83.98         | 46           | 13         | 45     | 13                | 397   | 43.3     |
| PA5366 ref | gi 15600559  ATP-binding component of ABC phosphate transporter                         | 83.28         | 70           | 18         | 54     | 18                | 277   | 31.0     |
| PA5367 ref | gi 15600560  membrane protein component of ABC phosphate transporter                    | 80.94         | 37           | 16         | 52     | 16                | 558   | 61.2     |
| PA0143 ref | gi 119167454  purine nucleosidase Nuh                                                   | 80.08         | 43           | 8          | 34     | 8                 | 350   | 37.5     |
| PA4022 ref | gi 15599217  hydrazine dehydrogenase, HdhA                                              | 76.37         | 31           | 11         | 32     | 11                | 506   | 54.9     |
| PA2338 ref | gi 15597534  probable binding protein component of ABC maltose/mannitol transporter     | 75.10         | 47           | 15         | 40     | 15                | 436   | 47.3     |
| PA5556 ref | gi 15600749  ATP synthase alpha chain                                                   | 73.51         | 28           | 14         | 38     | 14                | 514   | 55.4     |
| PA1327 ref | gi 15596524  probable protease                                                          | 72.35         | 31           | 19         | 44     | 19                | 656   | 72.5     |
| PA1585 ref | gi 15596782  2-oxoglutarate dehydrogenase (E1 subunit)                                  | 72.14         | 28           | 17         | 41     | 17                | 943   | 105.8    |
| PA4491 ref | gi 15599687  MagB                                                                       | 71.86         | 40           | 16         | 36     | 16                | 589   | 64.2     |
| PA5369 ref | gi 15600562  phosphate ABC transporter, periplasmic phosphate-binding protein, PstS     | 71.11         | 58           | 12         | 34     | 12                | 323   | 34.5     |
| PA3313 ref | gi 15598509  hypothetical protein                                                       | 69.45         | 53           | 14         | 38     | 14                | 335   | 36.5     |
| PA1940 ref | gi 15597136  hypothetical protein                                                       | 67.54         | 49           | 14         | 33     | 14                | 379   | 42.7     |
| PA0946 ref | gi 15596143  hypothetical protein                                                       | 62.52         | 59           | 10         | 29     | 10                | 345   | 36.8     |
| PA5143 ref | gi 15600336  imidazoleglycerol-phosphate dehydratase                                    | 61.38         | 59           | 9          | 36     | 9                 | 197   | 21.9     |
| PA3187 ref | gi 15598383  probable ATP-binding component of ABC transporter                          | 61.29         | 42           | 13         | 39     | 13                | 386   | 42.2     |
| PA5119 ref | gi 15600312  glutamine synthetase                                                       | 60.22         | 35           | 11         | 38     | 11                | 469   | 51.9     |
| PA3081 ref | gi 15598277  conserved hypothetical protein                                             | 57.70         | 52           | 14         | 33     | 14                | 455   | 50.6     |
| PA4394 ref | gi 15599590  conserved hypothetical protein                                             | 56.62         | 32           | 7          | 28     | 7                 | 278   | 29.8     |
| PA4825 ref | gi 15600018  Mg(2+) transport ATPase, P-type 2                                          | 56.24         | 17           | 14         | 36     | 14                | 903   | 100.0    |
| PA0070 ref | gi 15595268  TagQ1                                                                      | 53.90         | 35           | 7          | 20     | 7                 | 304   | 31.7     |
| PA5045 ref | gi 15600238  penicillin-binding protein 1A                                              | 53.36         | 30           | 19         | 36     | 19                | 822   | 91.1     |
| PA1807 ref | gi 15597004  NppD                                                                       | 53.33         | 36           | 12         | 29     | 12                | 536   | 59.0     |
| PA1984 ref | gi 15597180  NAD <sup>+</sup> dependent aldehyde dehydrogenase ExaC                     | 52.37         | 24           | 8          | 24     | 8                 | 506   | 54.9     |
| PA5418 ref | gi 15600611  sarcosine oxidase alpha subunit                                            | 51.22         | 18           | 12         | 24     | 12                | 1005  | 109.3    |
| PA4785 ref | gi 15599979  probable acyl-CoA thiolase                                                 | 50.71         | 41           | 12         | 35     | 12                | 425   | 45.9     |
| PA2953 ref | gi 15598149  electron transfer flavoprotein-ubiquinone oxidoreductase                   | 49.82         | 34           | 14         | 30     | 14                | 551   | 59.9     |
| PA2542 ref | gi 15597738  conserved hypothetical protein                                             | 48.38         | 17           | 13         | 32     | 13                | 1221  | 130.5    |
| PA3770 ref | gi 15598965  inosine-5'-monophosphate dehydrogenase                                     | 48.22         | 34           | 10         | 26     | 10                | 489   | 51.7     |
| PA3079 ref | gi 15598275  hypothetical protein                                                       | 47.24         | 23           | 13         | 28     | 13                | 793   | 87.3     |
| PA3816 ref | gi 15599011  O-acetylserine synthase                                                    | 46.13         | 40           | 8          | 24     | 8                 | 258   | 27.9     |
| PA3999 ref | gi 15599194  D-ala-D-ala-carboxypeptidase                                               | 46.01         | 32           | 9          | 23     | 9                 | 386   | 42.4     |
| PA5237 ref | gi 15600430  conserved hypothetical protein                                             | 45.74         | 43           | 12         | 28     | 12                | 488   | 54.6     |
| PA5076 ref | gi 15600269  probable binding protein component of ABC transporter                      | 45.25         | 48           | 11         | 24     | 11                | 266   | 29.7     |
| PA3026 ref | gi 15598222  conserved hypothetical protein                                             | 44.68         | 30           | 11         | 26     | 11                | 531   | 58       |
| PA4639 ref | gi 15599835  hypothetical protein                                                       | 44.16         | 54           | 8          | 46     | 8                 | 195   | 20.7     |
| PA3262 ref | gi 15598458  probable peptidyl-prolyl cis-trans isomerase, FkpP-type                    | 43.98         | 32           | 7          | 24     | 7                 | 253   | 26.8     |
| PA3716 ref | gi 15598911  hypothetical protein                                                       | 43.91         | 34           | 11         | 23     | 11                | 568   | 60.5     |
| PA1941 ref | gi 15597137  hypothetical protein                                                       | 43.30         | 24           | 13         | 26     | 13                | 631   | 70.9     |
| PA1171 ref | gi 15596368  SltB2                                                                      | 43.08         | 30           | 10         | 22     | 10                | 398   | 42.7     |
| PA4454 ref | gi 15599650  conserved hypothetical protein                                             | 42.94         | 73           | 8          | 21     | 8                 | 157   | 16.5     |
| PA5555 ref | gi 15600748  ATP synthase gamma chain                                                   | 41.97         | 48           | 9          | 21     | 9                 | 286   | 31.5     |
| PA5558 ref | gi 15600751  ATP synthase B chain                                                       | 41.22         | 46           | 6          | 24     | 6                 | 156   | 16.9     |
| PA4100 ref | gi 15599295  probable dehydrogenase                                                     | 41.11         | 31           | 12         | 24     | 12                | 559   | 60.3     |
| PA2973 ref | gi 15598169  probable peptidase                                                         | 40.65         | 34           | 7          | 15     | 7                 | 326   | 36       |
| PA5312 ref | gi 15600505  Aldehyde dehydrogenase                                                     | 40.44         | 27           | 8          | 19     | 8                 | 497   | 53.1     |

**Table S2.** Proteins present in the excised gel band from a native gel lane loaded with PAO1 lysate solution obtained from cells cultured aerobically. The proteins presented in the table have Sum PEP Score greater than 40 and are sorted from higher score to lower score.

| Description                                                                         | Sum PEP Score | Coverage [%] | # Peptides | # PSMs | # Unique Peptides | # AAs | MW [kDa] |
|-------------------------------------------------------------------------------------|---------------|--------------|------------|--------|-------------------|-------|----------|
| gi 15599581  GroEL protein                                                          | 353.22        | 78           | 39         | 420    | 39                | 547   | 57.1     |
| gi 15598011  probable acyl-CoA dehydrogenase                                        | 237.25        | 62           | 35         | 111    | 35                | 815   | 88.7     |
| gi 308198350  formate dehydrogenase-O, major subunit                                | 232.49        | 59           | 43         | 67     | 43                | 1025  | 113.9    |
| gi 15599929  hypothetical protein                                                   | 182.17        | 42           | 36         | 99     | 36                | 1088  | 118.5    |
| gi 15599619  conserved hypothetical protein                                         | 175.77        | 51           | 21         | 72     | 21                | 604   | 65.6     |
| gi 15599117  conserved hypothetical protein                                         | 168.30        | 69           | 25         | 77     | 25                | 455   | 51.2     |
| gi 15596539  AatJ                                                                   | 156.01        | 76           | 24         | 106    | 24                | 302   | 33       |
| gi 15596784  dihydrolipoamide dehydrogenase Lpd                                     | 151.53        | 43           | 20         | 68     | 20                | 478   | 50.1     |
| gi 15600339  hypothetical protein                                                   | 146.59        | 49           | 29         | 74     | 29                | 750   | 80.8     |
| gi 15600500  hypothetical protein                                                   | 141.69        | 45           | 27         | 72     | 27                | 855   | 92.9     |
| gi 15600561  membrane protein component of ABC phosphate transporter                | 139.99        | 50           | 22         | 68     | 22                | 677   | 73.8     |
| gi 15599685  MagD                                                                   | 138.86        | 33           | 30         | 72     | 30                | 1516  | 167.3    |
| gi 15598919  elastase LasB                                                          | 131.91        | 53           | 22         | 70     | 22                | 498   | 53.7     |
| gi 15597445  branched-chain alpha-keto acid dehydrogenase (lipoamide component)     | 130.98        | 48           | 18         | 58     | 18                | 428   | 45.7     |
| gi 15599043  hypothetical protein                                                   | 120.83        | 48           | 18         | 68     | 18                | 451   | 50.5     |
| gi 15599980  probable short-chain dehydrogenase                                     | 120.61        | 55           | 21         | 61     | 21                | 451   | 47.2     |
| gi 15599031  hypothetical protein                                                   | 117.90        | 60           | 17         | 55     | 17                | 325   | 34.2     |
| gi 15600560  membrane protein component of ABC phosphate transporter                | 112.32        | 34           | 17         | 60     | 17                | 558   | 61.2     |
| gi 15596524  probable protease                                                      | 97.79         | 35           | 20         | 54     | 20                | 656   | 72.5     |
| gi 15598965  inosine-5'-monophosphate dehydrogenase                                 | 93.09         | 54           | 17         | 51     | 17                | 489   | 51.7     |
| gi 15600312  glutamine synthetase                                                   | 92.17         | 41           | 16         | 51     | 16                | 469   | 51.9     |
| gi 15599431  bacterial ferritin                                                     | 91.11         | 84           | 11         | 38     | 11                | 154   | 17.9     |
| gi 15600559  ATP-binding component of ABC phosphate transporter                     | 89.23         | 71           | 18         | 52     | 18                | 277   | 31       |
| gi 15596783  dihydrolipoamide succinyltransferase (E2 subunit)                      | 84.07         | 41           | 13         | 37     | 13                | 409   | 42.9     |
| gi 15599217  hydrazone dehydrogenase, HdhA                                          | 83.86         | 36           | 12         | 32     | 12                | 506   | 54.9     |
| gi 15599687  MagB                                                                   | 79.99         | 36           | 19         | 42     | 19                | 589   | 64.2     |
| gi 15598509  hypothetical protein                                                   | 79.27         | 53           | 13         | 38     | 13                | 335   | 36.5     |
| gi 15600749  ATP synthase alpha chain                                               | 78.74         | 28           | 13         | 38     | 13                | 514   | 55.4     |
| gi 15598727  bacterioferritin                                                       | 78.18         | 85           | 11         | 59     | 11                | 158   | 18.5     |
| gi 15600238  penicillin-binding protein 1A                                          | 78.08         | 27           | 19         | 48     | 19                | 822   | 91.1     |
| gi 15600747  ATP synthase beta chain                                                | 75.36         | 39           | 11         | 34     | 11                | 458   | 49.5     |
| gi 15598195  Na+-translocating NADH:ubiquinone oxidoreductase subunit Nrq1          | 71.55         | 49           | 15         | 32     | 15                | 445   | 48.1     |
| gi 15597136  hypothetical protein                                                   | 70.41         | 47           | 14         | 38     | 14                | 379   | 42.7     |
| gi 15599888  ketol-acid reductoisomerase                                            | 68.11         | 38           | 9          | 30     | 9                 | 338   | 36.4     |
| gi 15600562  phosphate ABC transporter, periplasmic phosphate-binding protein, PstS | 67.72         | 59           | 12         | 32     | 12                | 323   | 34.5     |
| gi 15597534  probable binding protein component of ABC maltose/mannitol transporter | 66.28         | 32           | 13         | 35     | 13                | 436   | 47.3     |
| gi 15597004  NppD                                                                   | 61.03         | 30           | 13         | 27     | 13                | 536   | 59       |
| gi 15600269  probable binding protein component of ABC transporter                  | 58.11         | 43           | 11         | 29     | 11                | 266   | 29.7     |
| gi 15596143  hypothetical protein                                                   | 57.72         | 62           | 11         | 28     | 11                | 345   | 36.8     |
| gi 15598222  conserved hypothetical protein                                         | 56.64         | 36           | 13         | 33     | 13                | 531   | 58       |
| gi 15600018  Mg(2+) transport ATPase, P-type 2                                      | 56.51         | 18           | 15         | 35     | 15                | 903   | 100      |
| gi 15600628  probable transcarboxylase subunit                                      | 55.32         | 30           | 15         | 38     | 15                | 607   | 66.1     |
| gi 15599590  conserved hypothetical protein                                         | 54.98         | 33           | 7          | 26     | 7                 | 278   | 29.8     |
| gi 15597180  NAD+ dependent aldehyde dehydrogenase ExaC                             | 54.80         | 29           | 9          | 22     | 9                 | 506   | 54.9     |
| gi 15596782  2-oxoglutarate dehydrogenase (E1 subunit)                              | 54.78         | 23           | 14         | 35     | 14                | 943   | 105.8    |
| gi 119167454  purine nucleosidase Nuh                                               | 54.54         | 37           | 7          | 24     | 7                 | 350   | 37.5     |
| gi 15600753  ATP synthase A chain                                                   | 50.88         | 22           | 5          | 16     | 5                 | 289   | 31.9     |
| gi 15595656  probable ClpA/B protease ATP binding subunit                           | 50.83         | 20           | 12         | 26     | 11                | 850   | 94.1     |
| gi 15598458  probable peptidyl-prolyl cis-trans isomerase, FkbP-type                | 50.62         | 29           | 7          | 24     | 7                 | 253   | 26.8     |
| gi 15599473  elongation factor Tu                                                   | 50.41         | 39           | 10         | 27     | 10                | 397   | 43.3     |
| gi 15600611  sarcosine oxidase alpha subunit                                        | 49.95         | 15           | 10         | 22     | 10                | 1005  | 109.3    |
| gi 15599194  D-ala-D-ala-carboxypeptidase                                           | 49.73         | 29           | 10         | 22     | 10                | 386   | 42.4     |
| gi 15596786  succinyl-CoA synthetase alpha chain                                    | 49.08         | 52           | 9          | 30     | 9                 | 295   | 30.2     |
| gi 15596785  succinyl-CoA synthetase beta chain                                     | 45.93         | 37           | 11         | 24     | 11                | 388   | 41.5     |
| gi 15599835  hypothetical protein                                                   | 45.71         | 59           | 8          | 30     | 8                 | 195   | 20.7     |
| gi 15595599  aspartate carbamoyltransferase                                         | 44.25         | 37           | 8          | 24     | 8                 | 334   | 36.6     |
| gi 15600336  imidazoleglycerol-phosphate dehydratase                                | 43.79         | 55           | 8          | 24     | 8                 | 197   | 21.9     |
| gi 15600365  ornithine carbamoyltransferase, catabolic                              | 42.34         | 32           | 8          | 24     | 8                 | 336   | 38.1     |
| gi 15600430  conserved hypothetical protein                                         | 42.18         | 38           | 11         | 26     | 11                | 488   | 54.6     |
| gi 15599011  O-acetylserine synthase                                                | 41.92         | 40           | 8          | 20     | 8                 | 258   | 27.9     |
| gi 15595268  TagQ1                                                                  | 40.92         | 29           | 6          | 16     | 6                 | 304   | 31.7     |
| gi 15595218  T4P secretin-associated protein TsaP                                   | 40.89         | 35           | 8          | 20     | 8                 | 341   | 37.6     |
| gi 15598277  conserved hypothetical protein                                         | 40.23         | 32           | 9          | 20     | 9                 | 455   | 50.6     |
| gi 15599295  probable dehydrogenase                                                 | 40.00         | 28           | 10         | 20     | 10                | 559   | 60.3     |

**Table S3.** Proteins present in the excised gel band from a native gel lane loaded with  $\Delta bfrB$  lysate solution obtained from cells cultured anaerobically. The proteins presented in the table have Sum PEP Score greater than 40 and are sorted from higher score to lower score.

| Accession  | Description                                                        | Sum PEP Score | Coverage [%] | # Peptides | # PSMs | # Unique Peptides | # AAs | MW [kDa] |
|------------|--------------------------------------------------------------------|---------------|--------------|------------|--------|-------------------|-------|----------|
| PA3875 ref | gi 15599070  respiratory nitrate reductase alpha chain             | 309.16        | 62           | 52         | 228    | 52                | 1261  | 140.9    |
| PA0519 ref | gi 15595716  nitrite reductase precursor                           | 218.53        | 64           | 33         | 175    | 33                | 568   | 62.6     |
| PA3068 ref | gi 15598264  NAD-dependent glutamate dehydrogenase                 | 187.21        | 33           | 45         | 115    | 45                | 1620  | 182.5    |
| PA3874 ref | gi 15599069  respiratory nitrate reductase beta chain              | 165.53        | 65           | 34         | 134    | 34                | 513   | 58.1     |
| PA4270 ref | gi 15599466  DNA-directed RNA polymerase beta chain                | 157.02        | 36           | 38         | 99     | 38                | 1357  | 150.7    |
| PA0459 ref | gi 15595656  probable ClpA/B protease ATP binding subunit          | 156.87        | 50           | 31         | 88     | 29                | 850   | 94.1     |
| PA4269 ref | gi 15599465  DNA-directed RNA polymerase beta* chain               | 131.45        | 33           | 36         | 92     | 36                | 1399  | 154.3    |
| PA1587 ref | gi 15596784  dihydrolipoamide dehydrogenase Lpd                    | 122.82        | 44           | 18         | 74     | 18                | 478   | 50.1     |
| PA4235 ref | gi 15599431  bacterial ferritin                                    | 107.69        | 84           | 11         | 109    | 11                | 154   | 17.9     |
| PA1174 ref | gi 15596371  periplasmic nitrate reductase protein NapA            | 85.11         | 37           | 23         | 58     | 23                | 829   | 92.9     |
| PA3247 ref | gi 15598443  hypothetical protein                                  | 72.90         | 48           | 18         | 46     | 18                | 429   | 46.6     |
| PA5505 ref | gi 15600698  probable TonB-dependent receptor                      | 72.56         | 57           | 14         | 42     | 14                | 260   | 28.0     |
| PA5167 ref | gi 15600360  DctP                                                  | 70.19         | 45           | 11         | 43     | 11                | 331   | 37.0     |
| PA5078 ref | gi 15600271  OpgG                                                  | 61.72         | 36           | 16         | 39     | 16                | 525   | 59.4     |
| PA3922 ref | gi 15599117  conserved hypothetical protein                        | 61.50         | 49           | 11         | 34     | 11                | 455   | 51.2     |
| PA3915 ref | gi 15599110  molybdopterin biosynthetic protein B1                 | 59.59         | 76           | 9          | 22     | 9                 | 185   | 19.7     |
| PA3299 ref | gi 15598495  long-chain-fatty-acid--CoA ligase                     | 58.82         | 37           | 12         | 34     | 12                | 562   | 61.6     |
| PA0300 ref | gi 15595497  polyamine transport protein                           | 56.39         | 54           | 13         | 51     | 13                | 367   | 40.6     |
| PA3313 ref | gi 15598509  hypothetical protein                                  | 55.49         | 50           | 13         | 37     | 13                | 335   | 36.5     |
| PA0265 ref | gi 15595462  glutaric semialdehyde dehydrogenase                   | 55.37         | 37           | 10         | 24     | 10                | 483   | 51.6     |
| PA2540 ref | gi 15597736  conserved hypothetical protein                        | 53.21         | 39           | 13         | 28     | 13                | 586   | 65.4     |
| PA4238 ref | gi 15599434  DNA-directed RNA polymerase alpha chain               | 51.94         | 34           | 11         | 32     | 11                | 333   | 36.6     |
| PA4496 ref | gi 15599692  probable binding protein component of ABC transporter | 50.05         | 34           | 12         | 36     | 9                 | 537   | 60.0     |
| PA1337 ref | gi 15596534  glutaminase-asparaginase                              | 49.57         | 36           | 9          | 34     | 9                 | 362   | 38.6     |
| PA1094 ref | gi 15596291  flagellar capping protein FliD                        | 49.24         | 40           | 11         | 29     | 11                | 474   | 49.4     |
| PA2976 ref | gi 15598172  ribonuclease E                                        | 49.20         | 15           | 11         | 26     | 11                | 1057  | 117.4    |
| PA5378 ref | gi 15600571  CbcX                                                  | 48.68         | 43           | 11         | 24     | 11                | 312   | 34.4     |
| PA4949 ref | gi 15600142  conserved hypothetical protein                        | 47.07         | 29           | 8          | 22     | 8                 | 502   | 51.5     |
| PA3800 ref | gi 15598995  conserved hypothetical protein                        | 45.80         | 55           | 10         | 30     | 10                | 380   | 40.4     |
| PA0973 ref | gi 15596170  Peptidoglycan associated lipoprotein OprL precursor   | 44.17         | 39           | 5          | 25     | 5                 | 168   | 17.9     |
| PA5312 ref | gi 15600505  Aldehyde dehydrogenase                                | 43.63         | 35           | 11         | 28     | 11                | 497   | 53.1     |
| PA3236 ref | gi 15598432  BetX                                                  | 41.49         | 42           | 8          | 24     | 8                 | 285   | 31.1     |
